# Supplementary material for: miR-338-3p Is Down-Regulated by Hepatitis B Virus X and Inhibits Cell Proliferation by Targeting the 3′-UTR Region of CyclinD1
Source: Int J Mol Sci. 2012 Jul 9;13(7):8514–39. doi: 10.3390/ijms13078514 (PMC3430248; doi:10.3390/ijms13078514)
Supplement: Supplementary file 1 [file ijms-13-08514-s001.pdf]

# miR-338-3p Is Down-Regulated by Hepatitis B Virus X and Inhibits Cell Proliferation by Targeting the 3'-UTR Region of CyclinD1

## Supplementary Information

**Table S1.** Clinicopathological features and miR-338-3p expression of 23 patients with HCC.

| Clinical information                                   | No. of cases | miR-338-3p ( $-\Delta\text{CT}$ value) | <i>p</i> value |
|--------------------------------------------------------|--------------|----------------------------------------|----------------|
| Age (years)                                            |              |                                        | >0.05          |
| >40                                                    | 10           | $-6.717 \pm 0.201$                     | -              |
| <40                                                    | 13           | $-6.501 \pm 0.489$                     | -              |
| Gender                                                 |              |                                        | >0.05          |
| male                                                   | 18           | $-6.587 \pm 0.727$                     | -              |
| female                                                 | 5            | $-6.693 \pm 0.193$                     | -              |
| Tumor differentiated                                   |              |                                        | <0.05          |
| well                                                   | 7            | $-5.855 \pm 0.179$                     | -              |
| moderately                                             | 12           | $-6.518 \pm 0.238$                     | -              |
| poorly                                                 | 4            | $-6.973 \pm 0.214$                     | -              |
| The presence of liver cirrhosis of non-tumorous tissue |              |                                        | >0.05          |
| Yes                                                    | 15           | $-6.732 \pm 0.291$                     | -              |
| No                                                     | 8            | $-6.590 \pm 0.211$                     | -              |

Note: Clinicopathological characteristics and miR-338-3p expression of the patients. As shown in the table, miR-338-3p expression was reversely related with tumour grade. There was a tendency for miR-338-3p expression to decrease with the progression of tumor grade (poorly differentiated < moderately differentiated < well differentiated). However, there was no significant difference between miR-338-3p expression and other clinicopathological parameters in HCC, including state of age, gender, and liver cirrhosis in surrounded tumor tissue.

**Table S2.** The percentage of cells at G1/S stage of the cell cycle.

| Cells        | Groups       | G1               | S                |
|--------------|--------------|------------------|------------------|
| LO2/HBx      | mimics-NC    | $70.59 \pm 1.07$ | $22.01 \pm 1.27$ |
|              | mimics       | $83.82 \pm 1.05$ | $10.57 \pm 0.87$ |
|              | inhibitor-NC | $71.1 \pm 1.09$  | $20.41 \pm 1.39$ |
|              | inhibitor    | $59.55 \pm 1.1$  | $27.0 \pm 0.33$  |
| LO2/pcDNA3.0 | mimics-NC    | $76.10 \pm 1.68$ | $17.58 \pm 1.71$ |
|              | mimics       | $83.01 \pm 1.1$  | $10.87 \pm 1.31$ |
|              | inhibitor-NC | $77.20 \pm 1.57$ | $15.86 \pm 0.86$ |
|              | inhibitor    | $70.12 \pm 1.73$ | $19.97 \pm 1.31$ |
